# Supplementary material
Source: publisher site journal article supplement (https://www.dovepress.com/article/282240)
Supplement: Supplementary file 1 [file get_supplementary_file.php]

Supplementary Material





Figure S1: Schematic representation of the *ELN* gene and alignment of different C-terminal predicted proteins (WT, #1 with cryptic splice site #2 intron 32 retention and #3 exon 31 skipping and intron 32 retention).


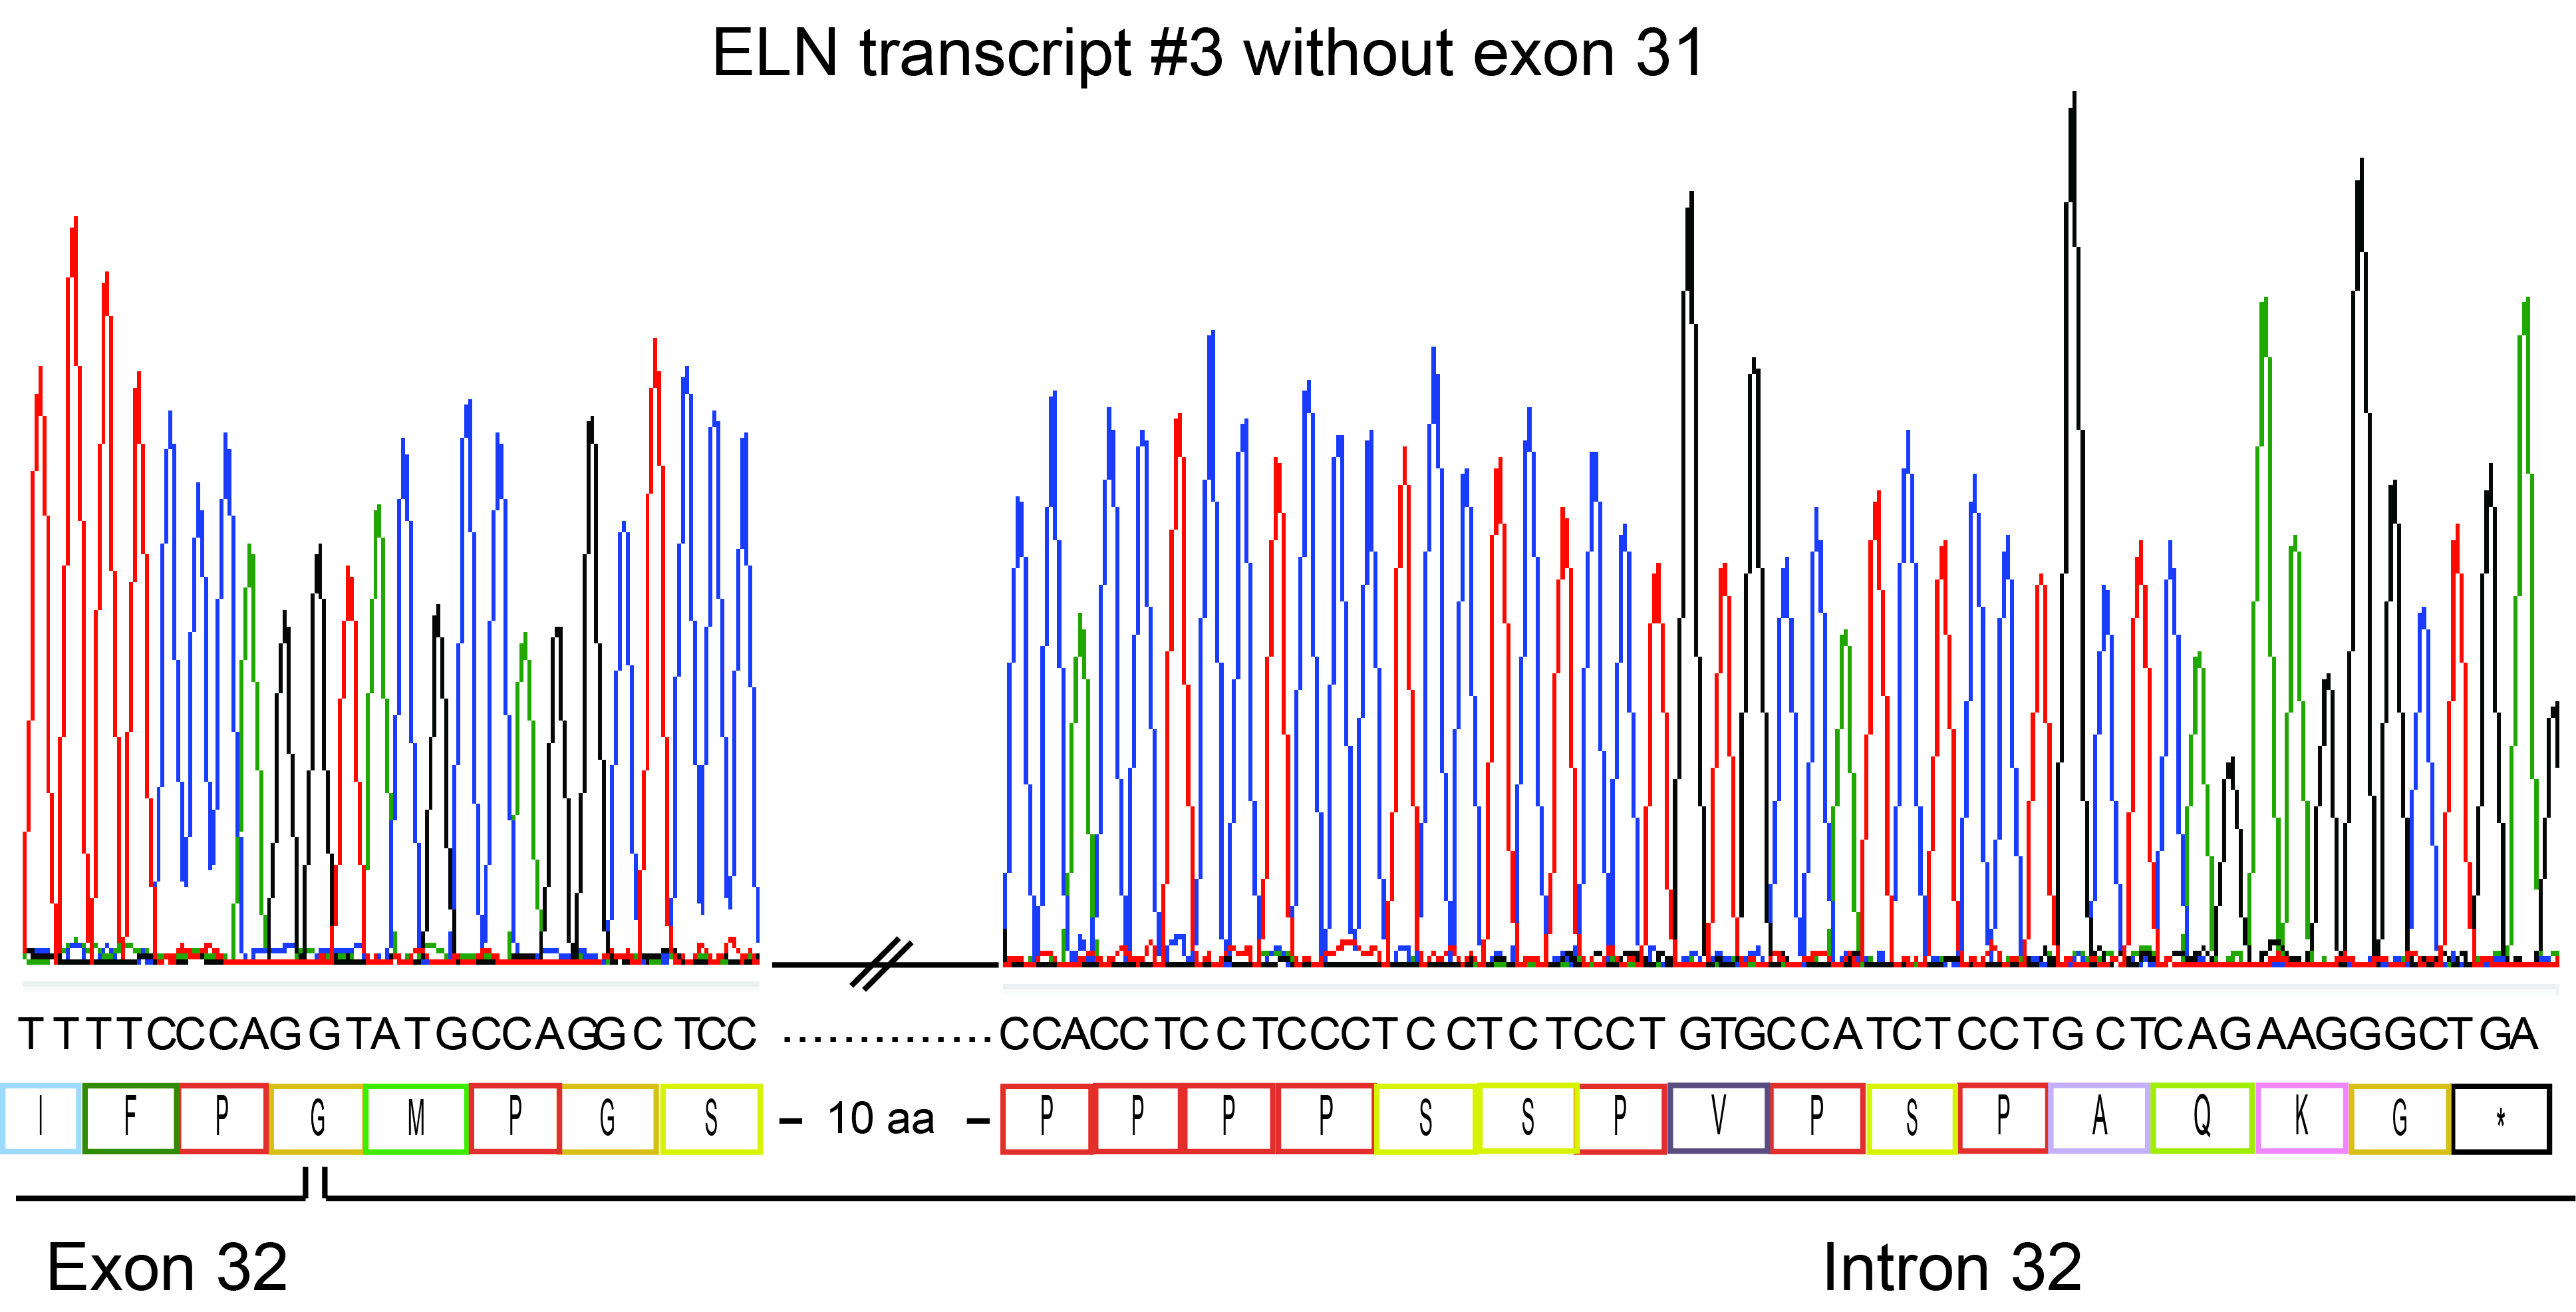


Figure S2: Chromatogram showing the alternative transcript (#3) with intron retention and predicted stop codon in the intron 32 and the splice out of the exon 31.
